# Supplementary material
Source: PubMed Central journal article supplement (PMC5624401)
Supplement: Supplementary_Table6.pdf [file Supplementary_Table6.pdf]

**TABLE 6: TBI patients and control subjects CSF proteomes**

|                |                                                                   |
|----------------|-------------------------------------------------------------------|
|                | Trauma-released after astrocyte stretch-injury <sup>1</sup> .     |
|                | Two-fold or more astrocyte-enriched proteins <sup>2</sup> .       |
|                | Trauma-released and two-fold or more astrocyte-enriched proteins. |
| <i>Italics</i> | Proteins are present in healthy plasma <sup>3,4</sup> .           |

|                       | Accession                                  | Protein Name                                                |
|-----------------------|--------------------------------------------|-------------------------------------------------------------|
| TBI only CSF proteins | O94760                                     | N(G),N(G)-dimethylarginine dimethylaminohydrolase 1         |
|                       | <i>P11142</i>                              | <i>Heat shock cognate 71 kDa protein</i>                    |
|                       | <i>P18206</i>                              | <i>Vinculin</i>                                             |
|                       | P15104                                     | Glutamine synthetase (GS) (EC 6.3.1.2)                      |
|                       | <i>P12277</i>                              | <i>Creatine kinase B-type</i>                               |
|                       | <i>Q06830</i>                              | <i>Peroxiredoxin-1</i>                                      |
|                       | <i>P31946</i>                              | <i>14-3-3 protein beta/alpha</i>                            |
|                       | <i>P62258</i>                              | <i>14-3-3 protein epsilon</i>                               |
|                       | <i>P61981</i>                              | <i>14-3-3 protein gamma</i>                                 |
|                       | <i>P63104</i>                              | <i>14-3-3 protein zeta/delta</i>                            |
|                       | <i>P23528</i>                              | <i>Cofilin-1</i>                                            |
|                       | <i>O75874</i>                              | <i>Isocitrate dehydrogenase cytoplasmic</i>                 |
|                       | <i>P00558</i>                              | <i>Phosphoglycerate kinase 1</i>                            |
|                       | <i>P13796</i>                              | <i>Plastin-2</i>                                            |
|                       | <i>P67936</i>                              | <i>Tropomyosin alpha-4 chain</i>                            |
|                       | <i>Q13885</i>                              | <i>Tubulin beta-2A chain</i>                                |
|                       | <i>P27348</i>                              | <i>14-3-3 protein theta</i>                                 |
|                       | <i>Q16555</i>                              | <i>Dihydropyrimidinase-related protein 2</i>                |
|                       | <i>P21333</i>                              | <i>Filamin-A</i>                                            |
|                       | <i>Q12765</i>                              | <i>Secernin-1</i>                                           |
|                       | <i>P06753</i>                              | <i>Tropomyosin alpha-3 chain</i>                            |
|                       | <i>P14136</i>                              | <i>Glial fibrillary acidic protein</i>                      |
|                       | <i>P30041</i>                              | <i>Peroxiredoxin-6</i>                                      |
|                       | <i>P08670</i>                              | <i>Vimentin</i>                                             |
|                       | <i>P80108</i>                              | <i>Phosphatidylinositol-glycan-specific phospholipase D</i> |
|                       | <i>P00491</i>                              | <i>Purine nucleoside phosphorylase</i>                      |
|                       | <i>P25713</i>                              | <i>Metallothionein-3</i>                                    |
|                       | <i>P00918</i>                              | <i>Carbonic anhydrase 2</i>                                 |
|                       | <i>Q01469</i>                              | <i>Fatty acid-binding protein, epidermal</i>                |
|                       | <i>P30043</i>                              | <i>Flavin reductase</i>                                     |
|                       | <i>Q06033</i>                              | <i>Inter-alpha-trypsin inhibitor heavy chain H3</i>         |
|                       | <i>P02545</i>                              | <i>Prelamin-A/C</i>                                         |
|                       | <i>P26447</i>                              | <i>Protein S100-A4</i>                                      |
| <i>P09382</i>         | <i>Galectin-1</i>                          |                                                             |
| <i>P09429</i>         | <i>High mobility group protein B1</i>      |                                                             |
| <i>P26583</i>         | <i>High mobility group protein B2</i>      |                                                             |
| <i>P18669</i>         | <i>Phosphoglycerate mutase 1</i>           |                                                             |
| <i>Q71U36</i>         | <i>Tubulin alpha-1A chain</i>              |                                                             |
| <i>P04040</i>         | <i>Catalase</i>                            |                                                             |
| <i>P21291</i>         | <i>Cysteine and glycine-rich protein 1</i> |                                                             |
| <i>P26038</i>         | <i>Moesin</i>                              |                                                             |
| <i>P06703</i>         | <i>Protein S100-A6</i>                     |                                                             |
| <i>P28799</i>         | <i>Granulins</i>                           |                                                             |
| <i>P54652</i>         | <i>Heat shock-related 70 kDa protein 2</i> |                                                             |
| <i>P35998</i>         | <i>26S protease regulatory subunit 7</i>   |                                                             |

## TBI only CSF proteins

|        |                                                  |
|--------|--------------------------------------------------|
| P68032 | <i>Actin, alpha cardiac muscle 1</i>             |
| P63261 | <i>Actin, cytoplasmic 2</i>                      |
| P00568 | <i>Adenylate kinase isoenzyme 1</i>              |
| Q01518 | <i>Adenylyl cyclase-associated protein 1</i>     |
| P12814 | <i>Alpha-actinin-1</i>                           |
| P04083 | <i>Annexin A1</i>                                |
| P04114 | <i>Apolipoprotein B-100</i>                      |
| P02655 | <i>Apolipoprotein C-II</i>                       |
| Q13790 | <i>Apolipoprotein F</i>                          |
| O14791 | <i>Apolipoprotein L1</i>                         |
| O95445 | <i>Apolipoprotein M</i>                          |
| P08519 | <i>Apolipoprotein(a)</i>                         |
| P07738 | <i>Bisphosphoglycerate mutase</i>                |
| P04003 | <i>C4b-binding protein alpha chain</i>           |
| P20851 | <i>C4b-binding protein beta chain</i>            |
| P05937 | <i>Calbindin</i>                                 |
| P00915 | <i>Carbonic anhydrase 1</i>                      |
| P16152 | <i>Carbonyl reductase</i>                        |
| P15169 | <i>Carboxypeptidase N catalytic chain</i>        |
| P22792 | <i>Carboxypeptidase N subunit 2</i>              |
| P49913 | <i>Cathelicidin antimicrobial peptide</i>        |
| O43866 | <i>CD5 antigen-like</i>                          |
| P06276 | <i>Cholinesterase</i>                            |
| P00740 | <i>Coagulation factor IX</i>                     |
| P05160 | <i>Coagulation factor XIII B chain</i>           |
| P02745 | <i>Complement C1q subcomponent subunit A</i>     |
| P31146 | <i>Coronin-1A</i>                                |
| P02741 | <i>C-reactive protein</i>                        |
| P06732 | <i>Creatine kinase M-type</i>                    |
| P13716 | <i>Delta-aminolevulinic acid dehydratase</i>     |
| P81605 | <i>Dermcidin</i>                                 |
| P15090 | <i>Fatty acid-binding protein, adipocyte</i>     |
| P02792 | <i>Ferritin light chain</i>                      |
| Q9UGM5 | <i>Fetuin-B</i>                                  |
| O75636 | <i>Ficolin-3</i>                                 |
| P05062 | <i>Fructose-bisphosphate aldolase B</i>          |
| P06744 | <i>Glucose-6-phosphate isomerase</i>             |
| P35754 | <i>Glutaredoxin-1</i>                            |
| P78417 | <i>Glutathione S-transferase omega-1</i>         |
| P09211 | <i>Glutathione S-transferase P</i>               |
| P69891 | <i>Hemoglobin subunit gamma-1</i>                |
| P26927 | <i>Hepatocyte growth factor-like protein</i>     |
| P10412 | <i>Histone H1.4</i>                              |
| P16401 | <i>Histone H1.5</i>                              |
| P62805 | <i>Histone H4</i>                                |
| Q86YZ3 | <i>Hornerin</i>                                  |
| Q14520 | <i>Hyaluronan-binding protein 2</i>              |
| P01591 | <i>Immunoglobulin J chain</i>                    |
| P02533 | <i>Keratin, type I cytoskeletal 14</i>           |
| P35908 | <i>Keratin, type II cytoskeletal 2 epidermal</i> |
| P13647 | <i>Keratin, type II cytoskeletal 5</i>           |
| P02788 | <i>Lactotransferrin</i>                          |
| P30740 | <i>Leukocyte elastase inhibitor</i>              |
| P18428 | <i>Lipopolysaccharide-binding protein</i>        |

## TBI only CSF proteins

|        |                                                                |
|--------|----------------------------------------------------------------|
| P00338 | <i>L-lactate dehydrogenase A chain</i>                         |
| P14151 | <i>L-selectin</i>                                              |
| Q9Y5Y7 | <i>Lymphatic vessel endothelial hyaluronic acid receptor 1</i> |
| P14174 | <i>Macrophage migration inhibitory factor</i>                  |
| P14780 | <i>Matrix metalloproteinase-9</i>                              |
| P11137 | <i>Microtubule-associated protein 2</i>                        |
| P19105 | <i>Myosin regulatory light chain 12A</i>                       |
| P12882 | <i>Myosin-1</i>                                                |
| P12883 | <i>Myosin-7</i>                                                |
| P35579 | <i>Myosin-9</i>                                                |
| P59665 | <i>Neutrophil defensin 1</i>                                   |
| P80188 | <i>Neutrophil gelatinase-associated lipocalin</i>              |
| P30044 | <i>Peroxiredoxin-5, mitochondrial</i>                          |
| P02775 | <i>Platelet basic protein</i>                                  |
| P02776 | <i>Platelet factor 4</i>                                       |
| P20742 | <i>Pregnancy zone protein</i>                                  |
| P07737 | <i>Profilin-1</i>                                              |
| P27918 | <i>Properdin</i>                                               |
| P25786 | <i>Proteasome subunit alpha type-1</i>                         |
| P28072 | <i>Proteasome subunit beta type-6</i>                          |
| P05109 | <i>Protein S100-A8</i>                                         |
| Q9UK55 | <i>Protein Z-dependent protease inhibitor</i>                  |
| Q92954 | <i>Proteoglycan 4</i>                                          |
| P31150 | <i>Rab GDP dissociation inhibitor alpha</i>                    |
| P52565 | <i>Rho GDP-dissociation inhibitor 1</i>                        |
| P52566 | <i>Rho GDP-dissociation inhibitor 2</i>                        |
| P0DJ18 | <i>Serum amyloid A-1 protein</i>                               |
| P0DJ19 | <i>Serum amyloid A-2 protein</i>                               |
| P02743 | <i>Serum amyloid P-component</i>                               |
| P04278 | <i>Sex hormone-binding globulin</i>                            |
| Q9H299 | <i>SH3 domain-binding glutamic acid-rich-like protein 3</i>    |
| P10599 | <i>Thioredoxin</i>                                             |
| P07996 | <i>Thrombospondin-1</i>                                        |
| P62328 | <i>Thymosin beta-4</i>                                         |
| P37837 | <i>Transaldolase</i>                                           |
| P29401 | <i>Transketolase</i>                                           |
| P68363 | <i>Tubulin alpha-1B chain</i>                                  |
| P68366 | <i>Tubulin alpha-4A chain</i>                                  |
| P07437 | <i>Tubulin beta chain</i>                                      |
| P68371 | <i>Tubulin beta-4B chain</i>                                   |
| P09936 | <i>Ubiquitin carboxyl-terminal hydrolase isozyme L1</i>        |
| P04275 | <i>von Willebrand factor</i>                                   |
| P61604 | <i>10 kDa heat shock protein, mitochondrial</i>                |
| P62191 | <i>26S protease regulatory subunit 4</i>                       |
| P17980 | <i>26S protease regulatory subunit 6A</i>                      |
| P43686 | <i>26S protease regulatory subunit 6B</i>                      |
| P62195 | <i>26S protease regulatory subunit 8</i>                       |
| Q13200 | <i>26S proteasome non-ATPase regulatory subunit 2</i>          |
| P51665 | <i>26S proteasome non-ATPase regulatory subunit 7</i>          |
| P52209 | <i>6-phosphogluconate dehydrogenase, decarboxylating</i>       |
| P00325 | <i>Alcohol dehydrogenase 1B</i>                                |
| Q9NZD4 | <i>Alpha-hemoglobin-stabilizing protein</i>                    |
| P20160 | <i>Azurocidin</i>                                              |
| P02730 | <i>Band 3 anion transport protein</i>                          |

## TBI only CSF proteins

|        |                                                            |
|--------|------------------------------------------------------------|
| Q562R1 | Beta-actin-like protein 2                                  |
| Q13938 | Calcyphosin                                                |
| P62158 | Calmodulin                                                 |
| P08311 | Cathepsin G                                                |
| P29762 | Cellular retinoic acid-binding protein 1                   |
| Q15782 | Chitinase-3-like protein 2                                 |
| O43405 | Cochlin                                                    |
| P32320 | Cytidine deaminase                                         |
| P19957 | Elafin                                                     |
| P12724 | Eosinophil cationic protein                                |
| P02794 | Ferritin heavy chain                                       |
| Q05315 | Galectin-10                                                |
| P00739 | Haptoglobin-related protein                                |
| P0DMV8 | Heat shock 70 kDa protein 1A                               |
| P08238 | Heat shock protein HSP 90-beta                             |
| P69892 | Hemoglobin subunit gamma-2                                 |
| Q14103 | Heterogeneous nuclear ribonucleoprotein D0                 |
| P22492 | Histone H1t                                                |
| P20671 | Histone H2A type 1-D                                       |
| O60814 | Histone H2B type 1-K                                       |
| P68431 | Histone H3.1                                               |
| P01877 | Ig alpha-2 chain C region                                  |
| P01880 | Ig delta chain C region                                    |
| P01743 | Ig heavy chain V-I region HG3                              |
| P23083 | Ig heavy chain V-I region V35                              |
| P06331 | Ig heavy chain V-II region ARH-77                          |
| P01824 | Ig heavy chain V-II region WAH                             |
| P01769 | Ig heavy chain V-III region GA                             |
| P01762 | Ig heavy chain V-III region TRO                            |
| P01779 | Ig heavy chain V-III region TUR                            |
| P01594 | Ig kappa chain V-I region AU                               |
| P01604 | Ig kappa chain V-I region Kue                              |
| P01605 | Ig kappa chain V-I region Lay                              |
| P01608 | Ig kappa chain V-I region Roy                              |
| P01610 | Ig kappa chain V-I region WEA                              |
| P01611 | Ig kappa chain V-I region Wes                              |
| P01616 | Ig kappa chain V-II region MIL                             |
| P04206 | Ig kappa chain V-III region GOL                            |
| P06311 | Ig kappa chain V-III region IARC/BL41                      |
| P01624 | Ig kappa chain V-III region POM                            |
| P01623 | Ig kappa chain V-III region WOL                            |
| P04211 | Ig lambda chain V region 4A                                |
| P01701 | Ig lambda chain V-I region NEW                             |
| P01702 | Ig lambda chain V-I region NIG-64                          |
| P04208 | Ig lambda chain V-I region WAH                             |
| P06889 | Ig lambda chain V-IV region MOL                            |
| A0M8Q6 | Ig lambda-7 chain C region                                 |
| P04220 | Ig mu heavy chain disease protein                          |
| P09960 | Leukotriene A-4 hydrolase                                  |
| P08637 | Low affinity immunoglobulin gamma Fc region receptor III-A |
| Q9BZG9 | Ly-6/neurotoxin-like protein 1                             |
| P40121 | Macrophage-capping protein                                 |
| P08493 | Matrix Gla protein                                         |
| P02686 | Myelin basic protein                                       |

|                            |                                                          |                                                                   |
|----------------------------|----------------------------------------------------------|-------------------------------------------------------------------|
| TBI only CSF proteins      | P20916                                                   | Myelin-associated glycoprotein                                    |
|                            | P24158                                                   | Myeloblastin                                                      |
|                            | P05164                                                   | Myeloperoxidase                                                   |
|                            | P60660                                                   | Myosin light polypeptide 6                                        |
|                            | P29966                                                   | Myristoylated alanine-rich C-kinase substrate                     |
|                            | P22894                                                   | Neutrophil collagenase                                            |
|                            | P59666                                                   | Neutrophil defensin 3                                             |
|                            | P08246                                                   | Neutrophil elastase                                               |
|                            | P10153                                                   | Non-secretory ribonuclease                                        |
|                            | P20472                                                   | Parvalbumin alpha                                                 |
|                            | O75594                                                   | Peptidoglycan recognition protein 1                               |
|                            | P15259                                                   | Phosphoglycerate mutase 2                                         |
|                            | P0CG48                                                   | Polyubiquitin-C                                                   |
|                            | P31949                                                   | Protein S100-A11                                                  |
|                            | P80511                                                   | Protein S100-A12                                                  |
|                            | P04271                                                   | Protein S100-B                                                    |
|                            | P48539                                                   | Purkinje cell protein 4                                           |
|                            | P48741                                                   | Putative heat shock 70 kDa protein 7                              |
|                            | Q9HD89                                                   | Resistin                                                          |
|                            | P63313                                                   | Thymosin beta-10                                                  |
| P07951                     | Tropomyosin beta chain                                   |                                                                   |
| Q13509                     | Tubulin beta-3 chain                                     |                                                                   |
| P04350                     | Tubulin beta-4A chain                                    |                                                                   |
| Q9BW30                     | Tubulin polymerization-promoting protein family member 3 |                                                                   |
| Q9Y279                     | V-set and immunoglobulin domain-containing protein 4     |                                                                   |
| TBI & Control CSF proteins | <i>P02649</i>                                            | <i>Apolipoprotein E</i>                                           |
|                            | <i>P10909</i>                                            | <i>Clusterin</i>                                                  |
|                            | <i>P09972</i>                                            | <i>Fructose-bisphosphate aldolase C</i>                           |
|                            | <i>P60709</i>                                            | <i>Actin, cytoplasmic 1</i>                                       |
|                            | <i>P07195</i>                                            | <i>L-lactate dehydrogenase B chain</i>                            |
|                            | <i>P13645</i>                                            | <i>Keratin, type I cytoskeletal 10</i>                            |
|                            | <i>P00441</i>                                            | <i>Superoxide dismutase</i>                                       |
|                            | <i>P06733</i>                                            | <i>Alpha-enolase</i>                                              |
|                            | <i>P06396</i>                                            | <i>Gelsolin</i>                                                   |
|                            | <i>P19823</i>                                            | <i>Inter-alpha-trypsin inhibitor heavy chain H2</i>               |
|                            | <i>P30086</i>                                            | <i>Phosphatidylethanolamine-binding protein 1</i>                 |
|                            | <i>P04075</i>                                            | <i>Fructose-bisphosphate aldolase A</i>                           |
|                            | <i>P40925</i>                                            | <i>Malate dehydrogenase, cytoplasmic</i>                          |
|                            | <i>P32119</i>                                            | <i>Peroxiredoxin-2</i>                                            |
|                            | <i>P04406</i>                                            | <i>Glyceraldehyde-3-phosphate dehydrogenase</i>                   |
|                            | <i>P00751</i>                                            | <i>Complement factor B</i>                                        |
|                            | <i>P62937</i>                                            | <i>Peptidyl-prolyl cis-trans isomerase A</i>                      |
|                            | <i>P01023</i>                                            | <i>Alpha-2-macroglobulin</i>                                      |
|                            | <i>P01019</i>                                            | <i>Angiotensinogen</i>                                            |
|                            | <i>P16070</i>                                            | <i>CD44 antigen</i>                                               |
|                            | <i>P0C0L5</i>                                            | <i>Complement C4-B</i>                                            |
|                            | <i>P01034</i>                                            | <i>Cystatin-C</i>                                                 |
|                            | <i>Q12805</i>                                            | <i>EGF-containing fibulin-like extracellular matrix protein 1</i> |
| <i>P18065</i>              | <i>Insulin-like growth factor-binding protein 2</i>      |                                                                   |
| <i>P36955</i>              | <i>Pigment epithelium-derived factor</i>                 |                                                                   |
| <i>Q13228</i>              | <i>Selenium-binding protein 1</i>                        |                                                                   |
| <i>Q14515</i>              | <i>SPARC-like protein 1</i>                              |                                                                   |
| <i>P19320</i>              | <i>Vascular cell adhesion protein 1</i>                  |                                                                   |

## TBI &amp; Control CSF proteins

|        |                                                                   |
|--------|-------------------------------------------------------------------|
| P36222 | Chitinase-3-like protein 1                                        |
| Q9UBP4 | Dickkopf-related protein 3                                        |
| O14594 | Neurocan core protein                                             |
| O00584 | Ribonuclease T2                                                   |
| O14498 | Immunoglobulin superfamily containing leucine-rich repeat protein |
| P01871 | Ig mu chain C region                                              |
| P06681 | Complement C2                                                     |
| P07108 | Acyl-CoA-binding protein                                          |
| P07225 | Vitamin K-dependent protein S                                     |
| P08294 | Extracellular superoxide dismutase                                |
| P09486 | SPARC                                                             |
| P12259 | Coagulation factor V                                              |
| P13473 | Lysosome-associated membrane glycoprotein 2                       |
| P17900 | Ganglioside GM2 activator                                         |
| P19022 | Cadherin-2                                                        |
| P43251 | Biotinidase                                                       |
| P49908 | Selenoprotein P                                                   |
| P78324 | Tyrosine-protein phosphatase non-receptor type substrate 1        |
| Q08380 | Galectin-3-binding protein                                        |
| Q12841 | Follistatin-related protein 1                                     |
| Q13449 | Limbic system-associated membrane protein                         |
| Q13740 | CD166 antigen                                                     |
| Q14118 | Dystroglycan                                                      |
| Q8WXD2 | Secretogranin-3                                                   |
| Q96GW7 | Brevican core protein                                             |
| Q9P121 | Neurotrimin                                                       |
| P02768 | Serum albumin                                                     |
| P02787 | Serotransferrin                                                   |
| P01024 | Complement C3                                                     |
| P00450 | Ceruloplasmin                                                     |
| P01008 | Antithrombin-III                                                  |
| P00738 | Haptoglobin                                                       |
| P02656 | Apolipoprotein C-III                                              |
| P02790 | Hemopexin                                                         |
| P07339 | Cathepsin D                                                       |
| P07602 | Prosaposin                                                        |
| P07858 | Cathepsin B                                                       |
| P08571 | Monocyte differentiation antigen CD14                             |
| P08697 | Alpha-2-antiplasmin                                               |
| P09871 | Complement C1s subcomponent                                       |
| P13591 | Neural cell adhesion molecule 1                                   |
| P16870 | Carboxypeptidase E                                                |
| P23142 | Fibulin-1                                                         |
| P43652 | Afamin                                                            |
| P61769 | Beta-2-microglobulin                                              |
| Q12907 | Vesicular integral-membrane protein VIP36                         |
| P02763 | Alpha-1-acid glycoprotein 1                                       |
| P19652 | Alpha-1-acid glycoprotein 2                                       |
| P01011 | Alpha-1-antichymotrypsin                                          |
| P01009 | Alpha-1-antitrypsin                                               |
| P04217 | Alpha-1B-glycoprotein                                             |
| P02765 | Alpha-2-HS-glycoprotein                                           |
| P02647 | Apolipoprotein A-I                                                |
| P02652 | Apolipoprotein A-II                                               |

## TBI &amp; Control CSF proteins

|        |                                                                               |
|--------|-------------------------------------------------------------------------------|
| P06727 | <i>Apolipoprotein A-IV</i>                                                    |
| P02654 | <i>Apolipoprotein C-I</i>                                                     |
| P05090 | <i>Apolipoprotein D</i>                                                       |
| P17174 | <i>Aspartate aminotransferase, cytoplasmic</i>                                |
| O75882 | <i>Attractin</i>                                                              |
| P98160 | <i>Basement membrane-specific heparan sulfate proteoglycan core protein</i>   |
| P02749 | <i>Beta-2-glycoprotein 1</i>                                                  |
| Q96KN2 | <i>Beta-Ala-His dipeptidase</i>                                               |
| P55290 | <i>Cadherin-13</i>                                                            |
| O94985 | <i>Calsyntenin-1</i>                                                          |
| Q96IY4 | <i>Carboxypeptidase B2</i>                                                    |
| Q9NQ79 | <i>Cartilage acidic protein 1</i>                                             |
| P43121 | <i>Cell surface glycoprotein MUC18</i>                                        |
| P00742 | <i>Coagulation factor X</i>                                                   |
| P00748 | <i>Coagulation factor XII</i>                                                 |
| P02452 | <i>Collagen alpha-1</i>                                                       |
| P08123 | <i>Collagen alpha-2</i>                                                       |
| P02746 | <i>Complement C1q subcomponent subunit B</i>                                  |
| P02747 | <i>Complement C1q subcomponent subunit C</i>                                  |
| P00736 | <i>Complement C1r subcomponent</i>                                            |
| Q9NZP8 | <i>Complement C1r subcomponent-like protein</i>                               |
| P0C0L4 | <i>Complement C4-A</i>                                                        |
| P01031 | <i>Complement C5</i>                                                          |
| P13671 | <i>Complement component C6</i>                                                |
| P10643 | <i>Complement component C7</i>                                                |
| P07357 | <i>Complement component C8 alpha chain</i>                                    |
| P07358 | <i>Complement component C8 beta chain</i>                                     |
| P07360 | <i>Complement component C8 gamma chain</i>                                    |
| P02748 | <i>Complement component C9</i>                                                |
| P00746 | <i>Complement factor D</i>                                                    |
| P08603 | <i>Complement factor H</i>                                                    |
| Q03591 | <i>Complement factor H-related protein 1</i>                                  |
| P36980 | <i>Complement factor H-related protein 2</i>                                  |
| P05156 | <i>Complement factor I</i>                                                    |
| P08185 | <i>Corticosteroid-binding globulin</i>                                        |
| Q16610 | <i>Extracellular matrix protein 1</i>                                         |
| P02671 | <i>Fibrinogen alpha chain</i>                                                 |
| P02675 | <i>Fibrinogen beta chain</i>                                                  |
| P02679 | <i>Fibrinogen gamma chain</i>                                                 |
| P02751 | <i>Fibronectin</i>                                                            |
| P09104 | <i>Gamma-enolase</i>                                                          |
| P22352 | <i>Glutathione peroxidase 3</i>                                               |
| P69905 | <i>Hemoglobin subunit alpha</i>                                               |
| P68871 | <i>Hemoglobin subunit beta</i>                                                |
| P02042 | <i>Hemoglobin subunit delta</i>                                               |
| P05546 | <i>Heparin cofactor 2</i>                                                     |
| P04196 | <i>Histidine-rich glycoprotein</i>                                            |
| P16403 | <i>Histone H1.2</i>                                                           |
| P22692 | <i>Insulin-like growth factor-binding protein 4</i>                           |
| P24592 | <i>Insulin-like growth factor-binding protein 6</i>                           |
| Q16270 | <i>Insulin-like growth factor-binding protein 7</i>                           |
| P35858 | <i>Insulin-like growth factor-binding protein complex acid labile subunit</i> |
| P19827 | <i>Inter-alpha-trypsin inhibitor heavy chain H1</i>                           |
| Q14624 | <i>Inter-alpha-trypsin inhibitor heavy chain H4</i>                           |

## TBI &amp; Control CSF proteins

|        |                                                                  |
|--------|------------------------------------------------------------------|
| P29622 | <i>Kallistatin</i>                                               |
| P35527 | <i>Keratin, type I cytoskeletal 9</i>                            |
| P04264 | <i>Keratin, type II cytoskeletal 1</i>                           |
| P01042 | <i>Kininogen-1</i>                                               |
| P02750 | <i>Leucine-rich alpha-2-glycoprotein</i>                         |
| P51884 | <i>Lumican</i>                                                   |
| P61626 | <i>Lysozyme C</i>                                                |
| P07333 | <i>Macrophage colony-stimulating factor 1 receptor</i>           |
| P01033 | <i>Metalloproteinase inhibitor 1</i>                             |
| P20774 | <i>Mimecan</i>                                                   |
| P02144 | <i>Myoglobin</i>                                                 |
| Q96PD5 | <i>N-acetylmuramoyl-L-alanine amidase</i>                        |
| O15394 | <i>Neural cell adhesion molecule 2</i>                           |
| O00533 | <i>Neural cell adhesion molecule L1-like protein</i>             |
| P55058 | <i>Phospholipid transfer protein</i>                             |
| P03952 | <i>Plasma kallikrein</i>                                         |
| P05155 | <i>Plasma protease C1 inhibitor</i>                              |
| P05154 | <i>Plasma serine protease inhibitor</i>                          |
| P00747 | <i>Plasminogen</i>                                               |
| Q15113 | <i>Procollagen C-endopeptidase enhancer 1</i>                    |
| P41222 | <i>Prostaglandin-H2 D-isomerase</i>                              |
| P02760 | <i>Protein AMBP</i>                                              |
| Q99497 | <i>Protein deglycase DJ-1</i>                                    |
| P06702 | <i>Protein S100-A9</i>                                           |
| P00734 | <i>Prothrombin</i>                                               |
| P14618 | <i>Pyruvate kinase PKM</i>                                       |
| P02753 | <i>Retinol-binding protein 4</i>                                 |
| P07998 | <i>Ribonuclease pancreatic</i>                                   |
| Q86VB7 | <i>Scavenger receptor cysteine-rich type 1 protein M130</i>      |
| P35542 | <i>Serum amyloid A-4 protein</i>                                 |
| P27169 | <i>Serum paraoxonase/arylesterase 1</i>                          |
| O00391 | <i>Sulfhydryl oxidase 1</i>                                      |
| P22105 | <i>Tenascin-X</i>                                                |
| P05452 | <i>Tetranectin</i>                                               |
| P05543 | <i>Thyroxine-binding globulin</i>                                |
| Q15582 | <i>Transforming growth factor-beta-induced protein ig-h3</i>     |
| P02766 | <i>Transthyretin</i>                                             |
| P60174 | <i>Triosephosphate isomerase</i>                                 |
| P02774 | <i>Vitamin D-binding protein</i>                                 |
| P04004 | <i>Vitronectin</i>                                               |
| P54289 | <i>Voltage-dependent calcium channel subunit alpha-2/delta-1</i> |
| P25311 | <i>Zinc-alpha-2-glycoprotein</i>                                 |
| P63267 | <i>Actin, gamma-enteric smooth muscle</i>                        |
| P05067 | <i>Amyloid beta A4 protein</i>                                   |
| P51693 | <i>Amyloid-like protein 1</i>                                    |
| O43505 | <i>Beta-1,4-glucuronyltransferase 1</i>                          |
| P80723 | <i>Brain acid soluble protein 1</i>                              |
| P07711 | <i>Cathepsin L1</i>                                              |
| P13987 | <i>CD59 glycoprotein</i>                                         |
| Q8TCZ2 | <i>CD99 antigen-like protein 2</i>                               |
| Q8N126 | <i>Cell adhesion molecule 3</i>                                  |
| Q8NFZ8 | <i>Cell adhesion molecule 4</i>                                  |
| P10645 | <i>Chromogranin-A</i>                                            |
| P12109 | <i>Collagen alpha-1 chain</i>                                    |



## TBI &amp; Control CSF proteins

|        |                                                                  |
|--------|------------------------------------------------------------------|
| Q12860 | Contactin-1                                                      |
| Q9P0K1 | Disintegrin and metalloproteinase domain-containing protein 22   |
| Q13822 | Ectonucleotide pyrophosphatase/phosphodiesterase family member 2 |
| O94919 | Endonuclease domain-containing 1 protein                         |
| P54764 | Ephrin type-A receptor 4                                         |
| P61916 | Epididymal secretory protein E1                                  |
| Q96KK5 | Histone H2A type 1-H                                             |
| P01876 | Ig alpha-1 chain C region                                        |
| P01857 | Ig gamma-1 chain C region                                        |
| P01859 | Ig gamma-2 chain C region                                        |
| P01860 | Ig gamma-3 chain C region                                        |
| P01861 | Ig gamma-4 chain C region                                        |
| P01764 | Ig heavy chain V-III region 23                                   |
| P01766 | Ig heavy chain V-III region BRO                                  |
| P01767 | Ig heavy chain V-III region BUT                                  |
| P01768 | Ig heavy chain V-III region CAM                                  |
| P01781 | Ig heavy chain V-III region GAL                                  |
| P01765 | Ig heavy chain V-III region TIL                                  |
| P01834 | Ig kappa chain C region                                          |
| P01593 | Ig kappa chain V-I region AG                                     |
| P01597 | Ig kappa chain V-I region DEE                                    |
| P01598 | Ig kappa chain V-I region EU                                     |
| P01613 | Ig kappa chain V-I region Ni                                     |
| P01606 | Ig kappa chain V-I region OU                                     |
| P01617 | Ig kappa chain V-II region TEW                                   |
| P01619 | Ig kappa chain V-III region B6                                   |
| P04207 | Ig kappa chain V-III region CLL                                  |
| P01620 | Ig kappa chain V-III region SIE                                  |
| P04433 | Ig kappa chain V-III region VG                                   |
| P04434 | Ig kappa chain V-III region VH                                   |
| P01625 | Ig kappa chain V-IV region Len                                   |
| P80748 | Ig lambda chain V-III region LOI                                 |
| P01714 | Ig lambda chain V-III region SH                                  |
| P0CG04 | Ig lambda-1 chain C regions                                      |
| P0CG05 | Ig lambda-2 chain C regions                                      |
| P0CG06 | Ig lambda-3 chain C regions                                      |
| Q9Y6R7 | IgGFC-binding protein                                            |
| B9A064 | Immunoglobulin lambda-like polypeptide 5                         |
| P01344 | Insulin-like growth factor II                                    |
| Q92876 | Kallikrein-6                                                     |
| O94772 | Lymphocyte antigen 6H                                            |
| P04156 | Major prion protein                                              |
| P41271 | Neuroblastoma suppressor of tumorigenicity 1                     |
| P05408 | Neuroendocrine protein 7B2                                       |
| Q92823 | Neuronal cell adhesion molecule                                  |
| O95502 | Neuronal pentraxin receptor                                      |
| O15240 | Neurosecretory protein VGF                                       |
| Q02818 | Nucleobindin-1                                                   |
| P10451 | Osteopontin                                                      |
| Q96FE7 | Phosphoinositide-3-kinase-interacting protein 1                  |
| Q9H3G5 | Probable serine carboxypeptidase CPVL                            |
| Q9UHG2 | ProSAAS                                                          |
| Q92520 | Protein FAM3C                                                    |
| Q99435 | Protein kinase C-binding protein NELL2                           |

|        |                                                                        |
|--------|------------------------------------------------------------------------|
| P05060 | Secretogranin-1                                                        |
| P13521 | Secretogranin-2                                                        |
| O75326 | Semaphorin-7A                                                          |
| Q5TFQ8 | Signal-regulatory protein beta-1 isoform 3                             |
| P04216 | Thy-1 membrane glycoprotein                                            |
| P13611 | Versican core protein                                                  |
| Q8TAG5 | V-set and transmembrane domain-containing protein 2A                   |
| Q8TEU8 | WAP, Kazal, immunoglobulin, Kunitz and NTR domain-containing protein 2 |

## Healthy CSF proteins only

|               |                                                                   |
|---------------|-------------------------------------------------------------------|
| <i>P11021</i> | <i>78 kDa glucose-regulated protein</i>                           |
| <i>P24593</i> | <i>Insulin-like growth factor-binding protein 5</i>               |
| <i>Q08431</i> | <i>Lactadherin</i>                                                |
| <i>P04180</i> | <i>Phosphatidylcholine-sterol acyltransferase</i>                 |
| <i>Q06481</i> | <i>Amyloid-like protein 2</i>                                     |
| <i>Q16620</i> | <i>BDNF/NT-3 growth factors receptor</i>                          |
| <i>P11362</i> | <i>Fibroblast growth factor receptor 1</i>                        |
| <i>P22304</i> | <i>Iduronate 2-sulfatase</i>                                      |
| <i>Q86UX2</i> | <i>Inter-alpha-trypsin inhibitor heavy chain H5</i>               |
| <i>Q96KG7</i> | <i>Multiple epidermal growth factor-like domains protein 10</i>   |
| <i>P23471</i> | <i>Receptor-type tyrosine-protein phosphatase zeta</i>            |
| <i>Q9NPR2</i> | <i>Semaphorin-4B</i>                                              |
| <i>O14773</i> | <i>Tripeptidyl-peptidase 1</i>                                    |
| <i>P30530</i> | <i>Tyrosine-protein kinase receptor UFO</i>                       |
| <i>Q99969</i> | <i>Retinoic acid receptor responder protein 2</i>                 |
| <i>P26992</i> | <i>Ciliary neurotrophic factor receptor subunit alpha</i>         |
| <i>O95967</i> | <i>EGF-containing fibulin-like extracellular matrix protein 2</i> |
| <i>P21802</i> | <i>Fibroblast growth factor receptor 2</i>                        |
| <i>P98095</i> | <i>Fibulin-2</i>                                                  |
| <i>Q8NBJ4</i> | <i>Golgi membrane protein 1</i>                                   |
| <i>P21246</i> | <i>Pleiotrophin</i>                                               |
| <i>O15031</i> | <i>Plexin-B2</i>                                                  |
| <i>P51888</i> | <i>Prolargin</i>                                                  |
| <i>O60883</i> | <i>Prosaposin receptor GPR37L1</i>                                |
| <i>O75711</i> | <i>Scrapie-responsive protein 1</i>                               |
| <i>Q9Y646</i> | <i>Carboxypeptidase Q</i>                                         |
| <i>Q01459</i> | <i>Di-N-acetylchitobiase</i>                                      |
| <i>P40189</i> | <i>Interleukin-6 receptor subunit beta</i>                        |
| <i>Q92859</i> | <i>Neogenin</i>                                                   |
| <i>Q6UX71</i> | <i>Plexin domain-containing protein 2</i>                         |
| <i>P23470</i> | <i>Receptor-type tyrosine-protein phosphatase gamma</i>           |
| <i>O60241</i> | <i>Adhesion G protein-coupled receptor B2</i>                     |
| <i>P49641</i> | <i>Alpha-mannosidase 2x</i>                                       |
| <i>P55283</i> | <i>Cadherin-4</i>                                                 |
| <i>Q9BY67</i> | <i>Cell adhesion molecule 1</i>                                   |
| <i>Q9Y287</i> | <i>Integral membrane protein 2B</i>                               |
| <i>Q9HCB6</i> | <i>Spondin-1</i>                                                  |
| <i>P08253</i> | <i>72 kDa type IV collagenase</i>                                 |
| <i>P27797</i> | <i>Calreticulin</i>                                               |
| <i>P02461</i> | <i>Collagen alpha-1 chain</i>                                     |
| <i>P12111</i> | <i>Collagen alpha-3 chain</i>                                     |
| <i>P14625</i> | <i>Endoplasmin</i>                                                |
| <i>Q9UBQ6</i> | <i>Exostosin-like 2</i>                                           |
| <i>P14314</i> | <i>Glucosidase 2 subunit beta</i>                                 |
| <i>O75144</i> | <i>ICOS ligand</i>                                                |
| <i>P33908</i> | <i>Mannosyl-oligosaccharide 1,2-alpha-mannosidase IA</i>          |

## Healthy CSF proteins only

|        |                                                                 |
|--------|-----------------------------------------------------------------|
| P16035 | <i>Metalloproteinase inhibitor 2</i>                            |
| Q7Z7M0 | <i>Multiple epidermal growth factor-like domains protein 8</i>  |
| P32004 | <i>Neural cell adhesion molecule L1</i>                         |
| P14543 | <i>Nidogen-1</i>                                                |
| P23515 | <i>Oligodendrocyte-myelin glycoprotein</i>                      |
| Q6UXB8 | <i>Peptidase inhibitor 16</i>                                   |
| P23284 | <i>Peptidyl-prolyl cis-trans isomerase B</i>                    |
| Q96S96 | <i>Phosphatidylethanolamine-binding protein 4</i>               |
| Q96NZ9 | <i>Proline-rich acidic protein 1</i>                            |
| Q9NYQ8 | <i>Protocadherin Fat 2</i>                                      |
| P23468 | <i>Receptor-type tyrosine-protein phosphatase delta</i>         |
| Q13332 | <i>Receptor-type tyrosine-protein phosphatase S</i>             |
| P34096 | <i>Ribonuclease 4</i>                                           |
| Q9Y6N7 | <i>Roundabout homolog 1</i>                                     |
| Q8WZ42 | <i>Titin</i>                                                    |
| Q24JP5 | <i>Transmembrane protein 132A</i>                               |
| Q9BRK5 | <i>45 kDa calcium-binding protein</i>                           |
| O94910 | <i>Adhesion G protein-coupled receptor L1</i>                   |
| O00468 | <i>Agrin</i>                                                    |
| P07686 | <i>Beta-hexosaminidase subunit beta</i>                         |
| Q9BQT9 | <i>Calsyntenin-3</i>                                            |
| Q8N3J6 | <i>Cell adhesion molecule 2</i>                                 |
| Q99674 | <i>Cell growth regulator with EF hand domain protein 1</i>      |
| Q6UW01 | <i>Cerebellin-3</i>                                             |
| Q16568 | <i>Cocaine- and amphetamine-regulated transcript protein</i>    |
| P39060 | <i>Collagen alpha-1 chain</i>                                   |
| P08174 | <i>Complement decay-accelerating factor</i>                     |
| Q02246 | <i>Contactin-2</i>                                              |
| Q9C0A0 | <i>Contactin-associated protein-like 4</i>                      |
| P07585 | <i>Decorin</i>                                                  |
| P09417 | <i>Dihydropteridine reductase</i>                               |
| P52799 | <i>Ephrin-B2</i>                                                |
| O94769 | <i>Extracellular matrix protein 2</i>                           |
| Q8IWU5 | <i>Extracellular sulfatase Sulf-2</i>                           |
| Q9UBX5 | <i>Fibulin-5</i>                                                |
| P14207 | <i>Folate receptor beta</i>                                     |
| Q6MZW2 | <i>Follistatin-related protein 4</i>                            |
| O00451 | <i>GDNF family receptor alpha-2</i>                             |
| P48058 | <i>Glutamate receptor 4</i>                                     |
| Q16769 | <i>Glutaminyl-peptide cyclotransferase</i>                      |
| Q9Y2T3 | <i>Guanine deaminase</i>                                        |
| Q8IZP7 | <i>Heparan-sulfate 6-O-sulfotransferase 3</i>                   |
| P18136 | <i>Ig kappa chain V-III region HIC</i>                          |
| P01622 | <i>Ig kappa chain V-III region Ti</i>                           |
| Q969P0 | <i>Immunoglobulin superfamily member 8</i>                      |
| Q9NX62 | <i>Inositol monophosphatase 3</i>                               |
| Q9UMF0 | <i>Intercellular adhesion molecule 5</i>                        |
| O43291 | <i>Kunitz-type protease inhibitor 2</i>                         |
| Q8N2S1 | <i>Latent-transforming growth factor beta-binding protein 4</i> |
| Q9NT99 | <i>Leucine-rich repeat-containing protein 4B</i>                |
| P42785 | <i>Lysosomal Pro-X carboxypeptidase</i>                         |
| P09603 | <i>Macrophage colony-stimulating factor 1</i>                   |
| P22897 | <i>Macrophage mannose receptor 1</i>                            |
| P55083 | <i>Microfibril-associated glycoprotein 4</i>                    |

## Healthy CSF proteins only

|        |                                                                     |
|--------|---------------------------------------------------------------------|
| Q16653 | Myelin-oligodendrocyte glycoprotein                                 |
| Q9NY97 | N-acetyllactosaminide beta-1,3-N-acetylglucosaminyltransferase 2    |
| Q9ULB1 | Neurexin-1                                                          |
| Q9P2S2 | Neurexin-2                                                          |
| Q9Y4C0 | Neurexin-3                                                          |
| Q9NPD7 | Neuritin                                                            |
| O94856 | Neurofascin                                                         |
| Q7Z3B1 | Neuronal growth regulator 1                                         |
| Q15818 | Neuronal pentraxin-1                                                |
| P47972 | Neuronal pentraxin-2                                                |
| Q5BLP8 | Neuropeptide-like protein C4orf48                                   |
| Q99574 | Neuroserpin                                                         |
| Q14112 | Nidogen-2                                                           |
| Q14982 | Opioid-binding protein/cell adhesion molecule                       |
| Q99983 | Osteomodulin                                                        |
| P19021 | Peptidyl-glycine alpha-amidating monooxygenase                      |
| P01127 | Platelet-derived growth factor subunit B                            |
| Q9NZ53 | Podocalyxin-like protein 2                                          |
| P01210 | Proenkephalin-A                                                     |
| Q5FWE3 | Proline-rich transmembrane protein 3                                |
| P01303 | Pro-neuropeptide Y                                                  |
| O15354 | Prosaposin receptor GPR37                                           |
| O60888 | Protein CutA                                                        |
| P48745 | Protein NOV homolog                                                 |
| Q8WZA1 | Protein O-linked-mannose beta-1,2-N-acetylglucosaminyltransferase 1 |
| Q9Y5F6 | Protocadherin gamma-C5                                              |
| C9JVV0 | Putative transmembrane protein INAFM1                               |
| Q92932 | Receptor-type tyrosine-protein phosphatase N2                       |
| Q16849 | Receptor-type tyrosine-protein phosphatase-like N                   |
| P78509 | Reelin                                                              |
| O75787 | Renin receptor                                                      |
| Q9BZR6 | Reticulon-4 receptor                                                |
| Q6NW40 | RGM domain family member B                                          |
| Q93091 | Ribonuclease K6                                                     |
| Q9BYH1 | Seizure 6-like protein                                              |
| Q6UXD5 | Seizure 6-like protein 2                                            |
| Q53EL9 | Seizure protein 6 homolog                                           |
| Q96PX8 | SLIT and NTRK-like protein 1                                        |
| Q8WVQ1 | Soluble calcium-activated nucleotidase 1                            |
| Q9H4F8 | SPARC-related modular calcium-binding protein 1                     |
| O60279 | Sushi domain-containing protein 5                                   |
| Q08629 | Testican-1                                                          |
| Q92563 | Testican-2                                                          |
| O43493 | Trans-Golgi network integral membrane protein 2                     |
| O75509 | Tumor necrosis factor receptor superfamily member 21                |
| Q6UX73 | UPF0764 protein C16orf89                                            |
| Q9UPU3 | VPS10 domain-containing receptor SorCS3                             |
| A6NLU5 | V-set and transmembrane domain-containing protein 2B                |
| Q15904 | V-type proton ATPase subunit S1                                     |
| Q9ULF5 | Zinc transporter ZIP10                                              |

---

## LEGEND to TABLE 6: TBI patients and control subjects CSF proteomes

Analytical mass spectrometry, by LC-MS/MS on LTQ-Orbitrap and Q-Exactive Orbitrap mass spectrometers was conducted on CSF from 19 severe and moderate TBI patients and 9 Control donors. Proteins were identified by MASCOT database searching (SwissProt/Uniprot Homo sapiens, 95% peptide confidence) to arrive at cumulative conservative TBI and healthy CSF protein lists using same conditions. These CSF proteomes served to determine the clinical presence of a previously identified astrocytic trauma-release proteome<sup>1</sup>. Proteins from this mouse trauma-release proteome that are also found in TBI CSF are highlighted in roseate<sup>1</sup>. Astrocyte-enriched proteins from a gene array study are highlighted in yellow<sup>2</sup>. Trauma-released and astrocyte-enriched proteins are highlighted in red. *Italics* indicate proteins present in healthy plasma proteomes<sup>3,4</sup>.

## PROTEOME TABLE REFERENCES

1. Levine J, Kwon E, Sondej M, et al. Traumatically injured astrocytes release a proteomic signature modulated by STAT3 dependent cell survival. *Glia*. 2016; 64: 668-94.
2. Cahoy JD, Emery B, Kaushal A, et al. A transcriptome database for astrocytes, neurons, and oligodendrocytes: a new resource for understanding brain development and function. *The Journal of neuroscience : the official journal of the Society for Neuroscience*. 2008; 28: 264-78.
3. Omenn GS, States DJ, Adamski M, et al. Overview of the HUPO Plasma Proteome Project: results from the pilot phase with 35 collaborating laboratories and multiple analytical groups, generating a core dataset of 3020 proteins and a publicly-available database. *Proteomics*. 2005; 5: 3226-45.
4. Schenk S, Schoenhals GJ, de Souza G and Mann M. A high confidence, manually validated human blood plasma protein reference set. *BMC Med Genomics*. 2008; 1: 41.
